# Supplementary material for: Peripherally targeted analgesia via AAV-mediated sensory neuron–specific inhibition of multiple pronociceptive sodium channels
Source: JCI journal article supplement (doi:10.1172/jci170813), 2024-05-09
Supplement: sd1 [file 1]

301 Moved Permanently

# Moved Permanently

The document has moved here.
